# Supplementary material for: Metabolomics reveals the mechanism of persistent toxicity of AgNPs at environmentally relevant concentrations to Daphnia magna
Source: Royal Society of Chemistry journal article supplement (doi:10.1039/d4en00350k), 2024-09-20
Supplement: d4en00350k1.pdf [file d4en00350k1.pdf]

## Supporting Information

### **Metabolomics reveals the mechanism of persistent toxicity of AgNPs at environmentally relevant concentrations to *Daphnia magna***

Qian-Qian Xiang<sup>1,2#</sup>, Qin-Qin Li<sup>2#</sup>, Peng Wang<sup>2</sup>, Hao-Chen Yang<sup>2</sup>, Zi-Hao Fu<sup>2</sup>, Xiang  
Liang<sup>2,3</sup>, Li-Qiang Chen<sup>2\*</sup>

<sup>1</sup>Yunnan Collaborative Innovation Center for Plateau Lake Ecology and Environmental  
Health, College of Agronomy and Life Sciences, Kunming University, Kunming  
650214, People's Republic of China.

<sup>2</sup>Institute of International Rivers and Eco-security, Yunnan Key Laboratory of  
International Rivers and Trans-Boundary Eco-security, Yunnan University, Kunming,  
650091, People's Republic of China.

<sup>3</sup>Yunnan Academy of Fishery Sciences, Kunming, 650224, People's Republic of China.

#These authors contributed equally

Corresponding author: \* Li-Qiang Chen, Email: [chenlq@ynu.edu.cn](mailto:chenlq@ynu.edu.cn). Tel/Fax: 86-  
0871-65034577.

## Materials and Methods

### Acute toxicity test

The acute toxicity experimental protocol for *D. magna* was conducted. According to the concentrations of AgNPs reported by Hou et al.,<sup>1</sup> acute toxicity experiments were set up with seven AgNPs concentration gradients: 0, 2, 4, 8, 16, 32, and 64 µg/L, and each concentration contained five parallels, and six experimental *D. magna* were placed in each beaker, and no feeding was performed during the experimental period. After 24 h of exposure, the death of *D. magna* was recorded and the LC<sub>50</sub> values were calculated using the logistic curve combined with probit model. Meanwhile, the sensitivity of *D. magna* was tested using potassium dichromate compounds and this study found the immobility of *D. magna* was compliant with OECD (2004) Guidelines standards. In addition, in order to distinguish the acute toxicity of silver nanoparticles and their released silver ions, control groups of silver ion supernatant without nanoparticles (i.e., Ctrl-10 nm and Ctrl-70 nm groups) were set up in this study. The Ctrl-10 nm group was the silver ion supernatant after centrifugation of AgNPs-10 nm, and the Ctrl-70 nm group was the AgNPs-70 nm centrifuged silver ion supernatant. The method for obtaining silver ion supernatant is as follows: seven different concentrations of AgNPs (0, 2, 4, 8, 16, 32, and 64 µg/L, 10 or 70 nm) cultures were exposed in an incubator for 24 h, after which they were transferred to a regular centrifuge tube and ultracentrifuged (4 °C, 12000 rpm, 150 min). After centrifugation, all the supernatants were put into ultrafiltration tubes (Millipore Amicon Ultra-15, 10 kDa) for further ultrafiltration separation (4 °C, 3000 g, 30 min), and the filtered solution after centrifugation was the

silver ions supernatant.

## References

1. J. Hou, Y. Zhou, C. J. Wang, S. G. Li and X. K. Wang. Toxic effects and molecular mechanism of different types of silver nanoparticles to the aquatic crustacean *Daphnia magna*. *Environ. Sci. Technol.*, 2017, **51**, 12868-12878.

## Figures and Tables

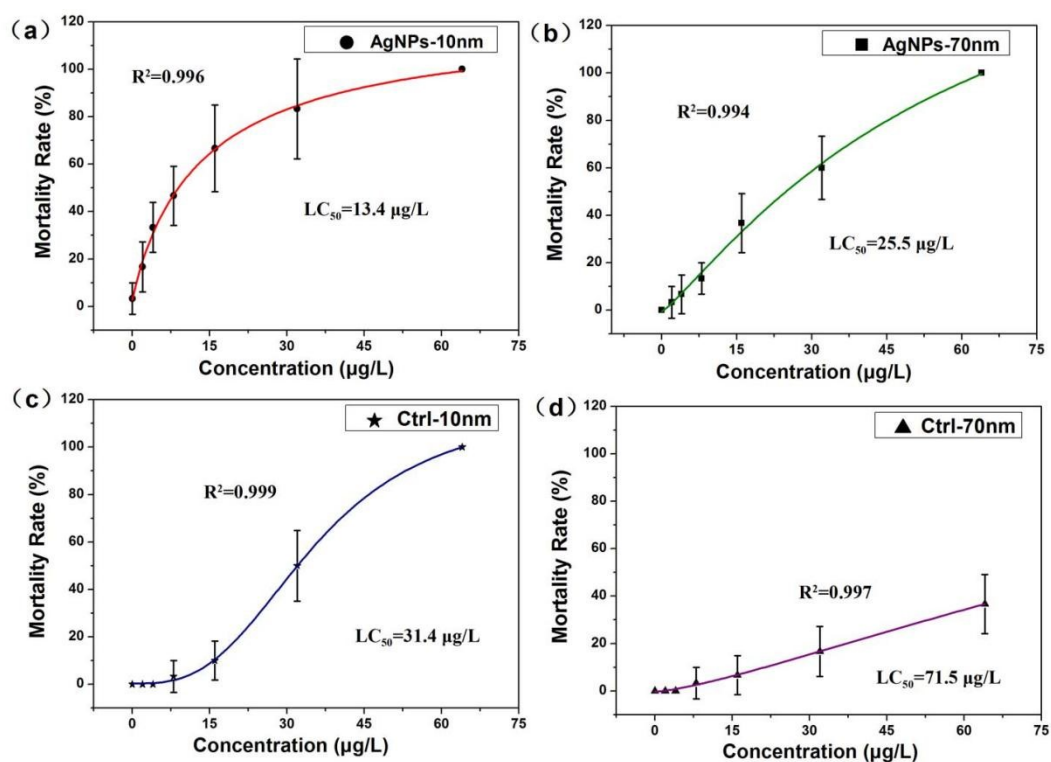

**Fig S1. Mortality rate of *D. magna* exposed to different concentrations of AgNPs and Ag<sup>+</sup> supernatant for 24 h. (a) AgNPs-10nm. (b) AgNPs-70nm. (c) Ctrl-10nm. (d) Ctrl-70nm.**

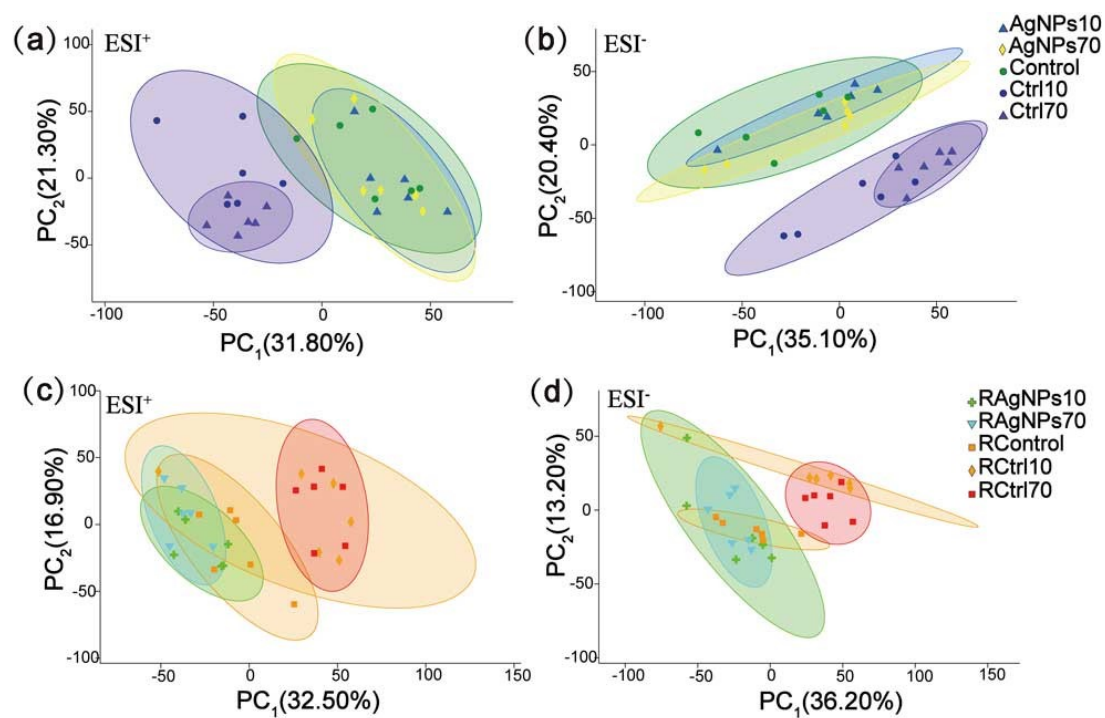

**Fig S2. Scatter plots of scores for the principal component analysis of metabolites in *D. magna* after exposure and recovery of AgNPs with different sizes. (a,b) Exposure stage. (c,d) Recovery stage. (a,c) ESI positive model. (b,d) ESI negative model.**

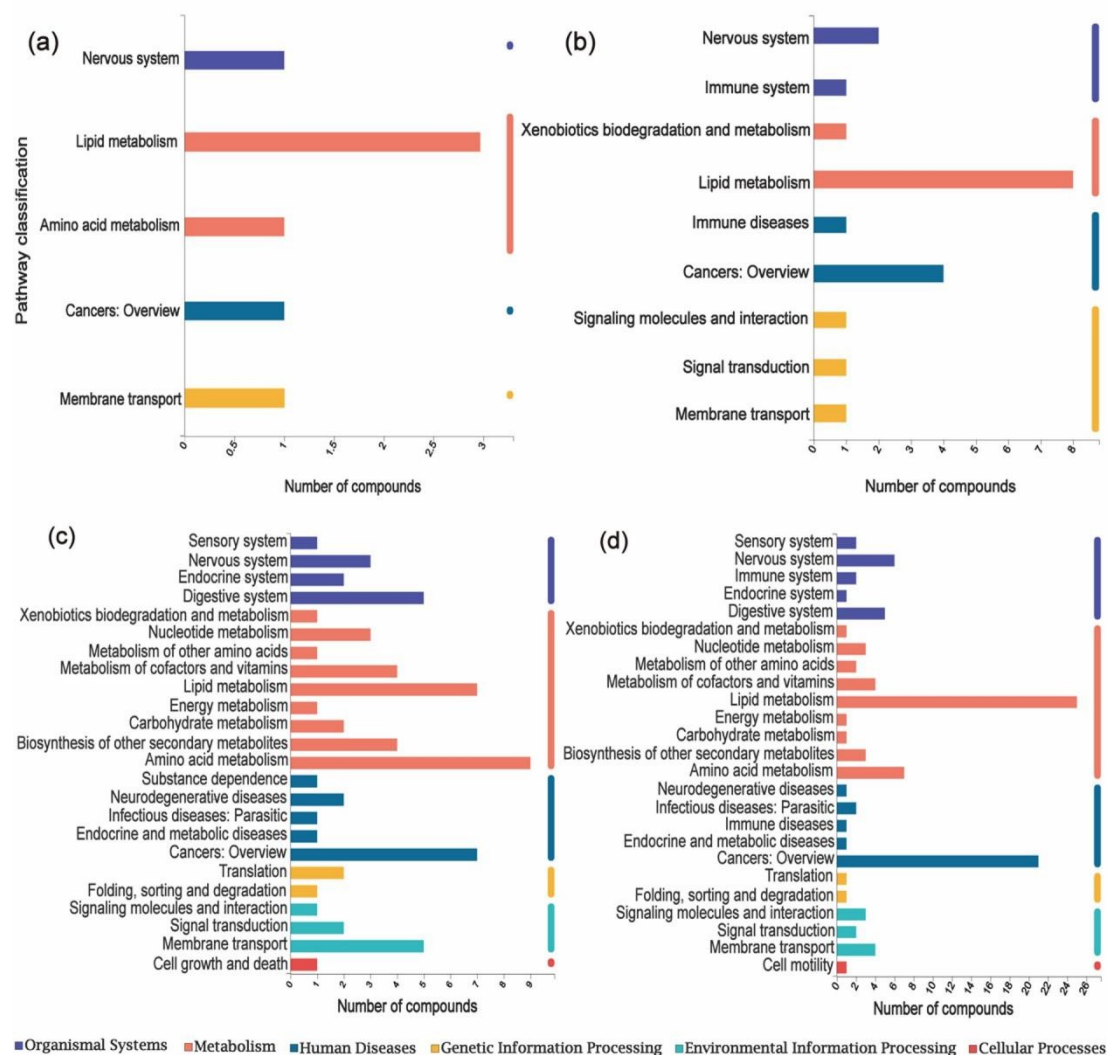

**Fig S3. KEGG classification analysis of differential metabolites in *D. magna* during the exposure stage. (a) AgNPs-10nm. (b) AgNPs-70nm. (c) Ctrl-10nm. (d) Ctrl-70nm.**

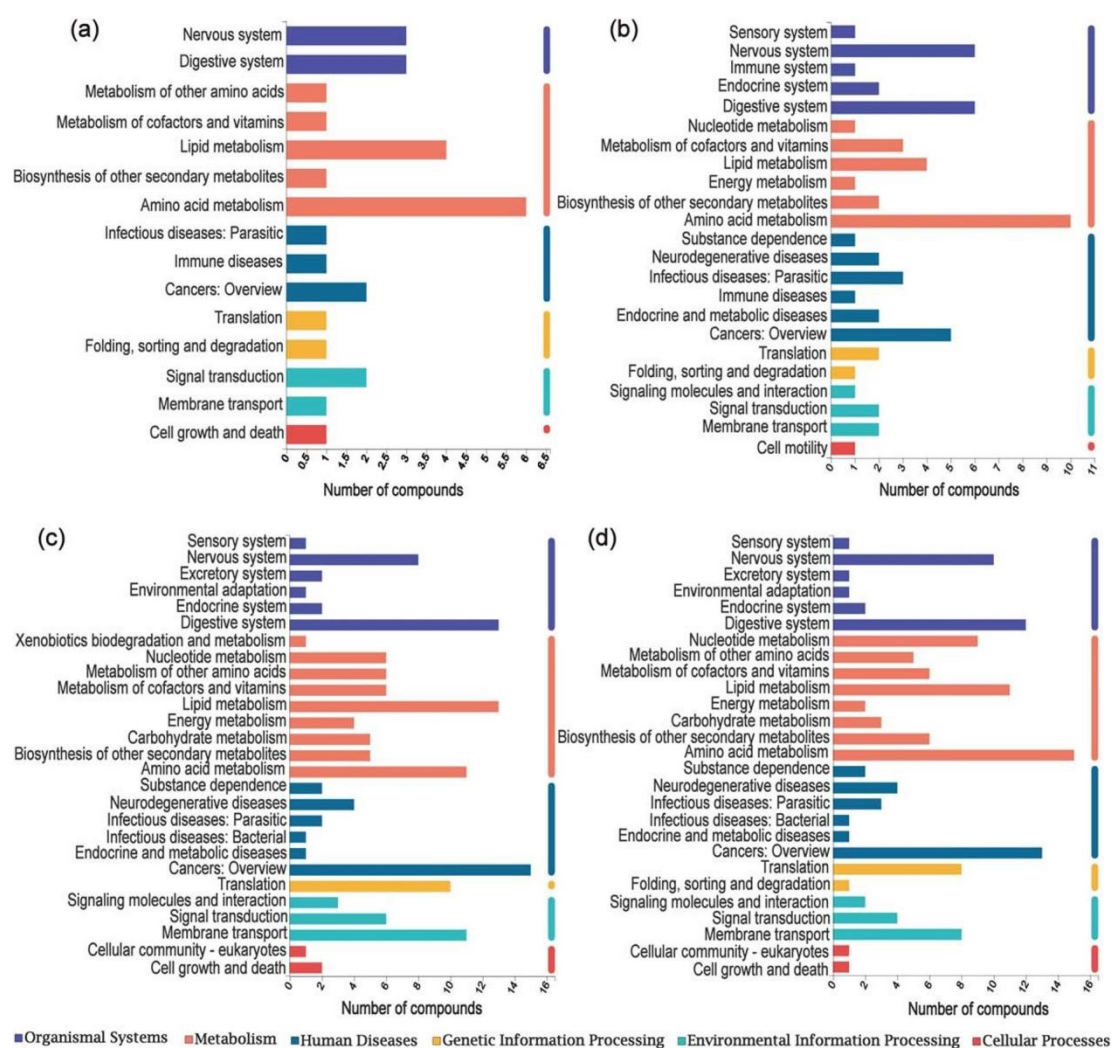

**Fig S4. KEGG classification analysis of differential metabolites in *D. magna* during the recovery stage. (a) AgNPs-10nm. (b) AgNPs-70nm. (c) Ctrl-10nm. (d) Ctrl-70nm.**

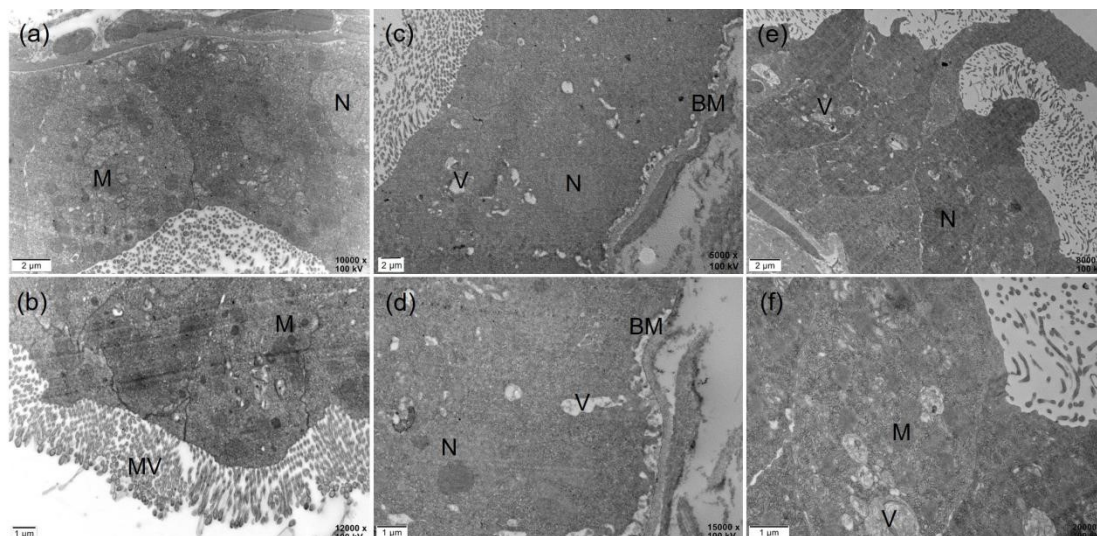

**Fig S5.** TEM images of the gut of *D. magna* after AgNPs exposure for 24 h. (a, b) Control group. (c, d) AgNP-10 nm group. (e, f) AgNP-70 nm group. MV: microvilli; M: mitochondrion; N: nucleus; V: vacuole; BM: basement membrane.

**Table S1. Analysis of specific metabolic pathways during the exposure stage**

| No. | Pathway name                         | <i>P</i> values |          |         |         |
|-----|--------------------------------------|-----------------|----------|---------|---------|
|     |                                      | AgNPs-10        | AgNPs-70 | Ctrl-10 | Ctrl-70 |
| 1   | Lysine degradation                   | 0.0542          | /        | /       | /       |
| 2   | Arachidonic acid metabolism          | 0.0774          | 0.0192*  | /       | 0.0816  |
| 3   | Alpha-Linolenic acid metabolism      | 0.0439*         | 0.1163   | /       | 0.2368  |
| 4   | Lysine biosynthesis                  | 0.0367*         | /        | 0.194   | 0.2015  |
| 5   | Linoleic acid metabolism             | 0.0295*         | 0.079    | /       | 0.1646  |
| 6   | Retrograde endocannabinoid signaling | 0.0201*         | 0.0542   | /       | 0.1148  |
| 7   | Fatty acid degradation               | 0.0521          | 0.137    | /       | 0.2754  |
| 8   | Fc epsilon RI signaling pathway      | /               | 0.0317*  | /       | 0.0861  |

Note: \* represent the significant difference at  $p<0.05$  levels.
